# Supplementary material for: Characterization of an Ex Vivo Equine Endometrial Tissue Culture Model Using Next-Generation RNA-Sequencing Technology
Source: Animals (Basel). 2021 Jul 3;11(7):1995. doi: 10.3390/ani11071995 (PMC8300099; doi:10.3390/ani11071995)
Supplement: Supplementary file 1 [file animals-11-01995-s001.zip]

Archive with 14 entries (14 files):
- Supplementary File 1 - Table S1 - Characterization of the phase of the oestrous cycle.pdf
- __MACOSX/._Supplementary File 1 - Table S1 - Characterization of the phase of the oestrous cycle.pdf
- Supplementary File 2 - Table S2 - Kenney Classification of Mare's endometrium.pdf
- __MACOSX/._Supplementary File 2 - Table S2 - Kenney Classification of Mare's endometrium.pdf
- Supplementary File 3 - Table S3 - Summary of the 32 RNA-Sequencing samples.pdf
- __MACOSX/._Supplementary File 3 - Table S3 - Summary of the 32 RNA-Sequencing samples.pdf
- Supplementary File 4 - Table S4 - Summary of the 41 enriched KEGG pathways when comparing the transcriptome at 24 h relative to the transcriptome at 0 h.xlsx
- __MACOSX/._Supplementary File 4 - Table S4 - Summary of the 41 enriched KEGG pathways when comparing the transcriptome at 24 h relative to the transcriptome at 0 h.xlsx
- Supplementary File 5 - Figure S1 - Pearson correlations between endometritis associated biomarkers genes focusing on (a) ESR1 and (b) PTGS2.pdf
- __MACOSX/._Supplementary File 5 - Figure S1 - Pearson correlations between endometritis associated biomarkers genes focusing on (a) ESR1 and (b) PTGS2.pdf
- Supplementary File 6 - Figure S2 - DEGs in the Tumor Necrosis Factor TNF Signalling Pathway between 24 and 0 h.pdf
- __MACOSX/._Supplementary File 6 - Figure S2 - DEGs in the Tumor Necrosis Factor TNF Signalling Pathway between 24 and 0 h.pdf
- Supplementary File 7 - Figure S3 - DEGs in the Cytokine-Cytokine Receptor Interaction Pathway between 24 and 0 h.pdf
- __MACOSX/._Supplementary File 7 - Figure S3 - DEGs in the Cytokine-Cytokine Receptor Interaction Pathway between 24 and 0 h.pdf
