# Supplementary material for: Characterization of an Ex Vivo Equine Endometrial Tissue Culture Model Using Next-Generation RNA-Sequencing Technology
Source: Animals (Basel). 2021 Jul 3;11(7):1995. doi: 10.3390/ani11071995 (PMC8300099; doi:10.3390/ani11071995)
Supplement: Supplementary file 1 [file animals-11-01995-s001.zip › Supplementary File 1 - Table S1 - Characterization of the phase of the oestrous cycle.pdf]

**Table S1**

**Characterization of the phase of the oestrous cycle based on an ultrasonic view of ovaries and physical aspect of the cervix and progesterone analyses**

| <b>Stage of the cycle</b> | <b>Ovaries</b>                                                                                                                                                                                            | <b>Cervix</b>                                                                                                                                                                                      | <b>Progesterone concentration</b> |
|---------------------------|-----------------------------------------------------------------------------------------------------------------------------------------------------------------------------------------------------------|----------------------------------------------------------------------------------------------------------------------------------------------------------------------------------------------------|-----------------------------------|
| Follicular                | One or occasionally two dominant follicles (>35 mm in diameter), absence of corpus luteum, follicle wall increasingly echogenic and follicle changing from spherical to irregular shape before ovulation. | Cervix is red in colour, soft, open and with a 'rose flower' characteristic. Two to three fingers can be passed through the cervix.                                                                | < 2 ng/mL                         |
| Luteal                    | Follicles between 5 to 25 mm in diameter, increasing in size as luteal phase progresses. Presence of corpus luteum.                                                                                       | Cervix is pale, closed and with a 'close bud' characteristic. No finger can be passed through cervix at early luteal phase, whereas one to two fingers can be passed through at late luteal phase. | > 2 ng/mL                         |
| Anoestrous                | Few small follicles (<15 mm). Absence of corpus luteum.                                                                                                                                                   | Cervix is pale in colour. Little cervical tone, one finger can be passed through the cervical os.                                                                                                  | < 1 ng/mL                         |
