# Supplementary material for: Characterization of an Ex Vivo Equine Endometrial Tissue Culture Model Using Next-Generation RNA-Sequencing Technology
Source: Animals (Basel). 2021 Jul 3;11(7):1995. doi: 10.3390/ani11071995 (PMC8300099; doi:10.3390/ani11071995)
Supplement: Supplementary file 1 [file animals-11-01995-s001.zip › Supplementary File 2 - Table S2 - Kenney Classification of Mare's endometrium.pdf]

**Table S2**  
**Kenney Classification of Mares' Endometrium**

| <b>Mares</b> | <b>Histology report</b>                                                                                                                                                                                                                                                                   | <b>Kenney classification</b> |
|--------------|-------------------------------------------------------------------------------------------------------------------------------------------------------------------------------------------------------------------------------------------------------------------------------------------|------------------------------|
| 1            | Medium epithelium. Stratum compactum examined, no pathologic findings noted. Stratum spongiosum showed diffuse grade 1 fibrosis.                                                                                                                                                          | I                            |
| 2            | Medium epithelium. Stratum compactum showed lymphocyte focal infiltration grade 1. Stratum spongiosum examined, no pathologic findings noted.                                                                                                                                             | I                            |
| 3            | Medium epithelium. Stratum compactum examined, no pathologic findings noted. Stratum spongiosum showed focal cystic glands grade 1.                                                                                                                                                       | I                            |
| 4            | Tall epithelium. Stratum compactum showed diffuse gland atrophy grade 1. Stratum spongiosum showed diffuse gland atrophy grade 2, multifocal cystic glands grade 3 with inspissated contents, fibrosis periglandular grade 3 and lymphocyte infiltration grade 1.                         | II                           |
| 5            | Tall epithelium. Stratum compactum showed lymphocyte infiltration grade 1. Stratum spongiosum showed focal cystic glands grade 1.                                                                                                                                                         | I                            |
| 6            | Medium epithelium. Stratum compactum showed lymphocyte infiltration grade 1, macrophage and erythrophagocytes infiltration grade 2. Stratum spongiosum showed lymphocyte infiltration grade 1, macrophage and erythrophagocytes infiltration grade 2 and siderocyte infiltration grade 1. | I                            |
| 7            | Tall epithelium. Stratum compactum showed focal lymphocyte infiltration grade 1. Stratum spongiosum examined, no pathologic findings noted.                                                                                                                                               | I                            |
| 8            | Stratum compactum showed infiltration of macrophages and erythrophagocytes grade 3. Stratum spongiosum showed focal cystic glands grade 1, focal periglandular fibrosis grade 1 and infiltration of macrophages and erythrophagocytes grade 1.                                            | I                            |

<sup>a</sup> Grade 1 = minimal/very few/very small. Grade 2 = slight/few/small. Grade 3 = moderate/moderate number/moderate size. Grade 4 = marked/many/large.
