# Supplementary material for: Characterization of an Ex Vivo Equine Endometrial Tissue Culture Model Using Next-Generation RNA-Sequencing Technology
Source: Animals (Basel). 2021 Jul 3;11(7):1995. doi: 10.3390/ani11071995 (PMC8300099; doi:10.3390/ani11071995)
Supplement: Supplementary file 1 [file animals-11-01995-s001.zip › Supplementary File 3 - Table S3 - Summary of the 32 RNA-Sequencing samples.pdf]

**Table S3**  
**Summary of the 32 RNA-Sequencing samples**

| Horse  | Total sequences<br>Raw reads <sup>a</sup> | Sequences after<br>trimming <sup>b</sup> | Per sequence GC<br>content (%) | Aligned<br>pairs <sup>c</sup> | Alignment<br>rate <sup>d</sup> | Total<br>count <sup>e</sup> |
|--------|-------------------------------------------|------------------------------------------|--------------------------------|-------------------------------|--------------------------------|-----------------------------|
| H1-0h  | 19717258                                  | 8502094                                  | 49                             | 7358186                       | 86.2%                          | 5197583                     |
| H1-24h | 67308470                                  | 32342562                                 | 50                             | 2884440                       | 88.9%                          | 2180946                     |
| H1-48h | 19839515                                  | 9954298                                  | 50                             | 8838404                       | 88.5%                          | 6823863                     |
| H1-72h | 14432128                                  | 7358130                                  | 50                             | 6582181                       | 89.1%                          | 4900818                     |
| H2-0h  | 18178744                                  | 9085634                                  | 51                             | 7880970                       | 86.5%                          | 5655934                     |
| H2-24h | 12681202                                  | 6069612                                  | 50.5                           | 5437735                       | 89.3%                          | 4184830                     |
| H2-48h | 30143876                                  | 15499068                                 | 50                             | 1411214                       | 90.7%                          | 1082339                     |
| H2-72h | 12826353                                  | 6530807                                  | 49.5                           | 5933521                       | 90.4%                          | 4429069                     |
| H3-0h  | 20960250                                  | 10117417                                 | 50                             | 9154720                       | 90.2%                          | 6380111                     |
| H3-24h | 15509308                                  | 7851773                                  | 50                             | 7119652                       | 90.4%                          | 5369106                     |
| H3-48h | 16948027                                  | 8578848                                  | 51                             | 7836263                       | 91.1%                          | 5985166                     |
| H3-72h | 25647761                                  | 13313650                                 | 50.5                           | 1225096                       | 91.6%                          | 9310609                     |
| H4-0h  | 28670134                                  | 13715002                                 | 51                             | 1194665                       | 86.8%                          | 8575720                     |
| H4-24h | 20422712                                  | 10795659                                 | 51                             | 9902068                       | 91.4%                          | 7521370                     |
| H4-48h | 15788862                                  | 8014918                                  | 51                             | 7388535                       | 91.9%                          | 5582761                     |
| H4-72h | 18383955                                  | 9131700                                  | 51                             | 8317166                       | 90.8%                          | 6402180                     |
| H5-0h  | 22947695                                  | 9857331                                  | 50.5                           | 8960958                       | 90.6%                          | 6415387                     |
| H5-24h | 21849937                                  | 10419618                                 | 51                             | 9440102                       | 90.3%                          | 7128889                     |
| H5-48h | 24772671                                  | 12453536                                 | 51                             | 1146623                       | 91.7%                          | 8804639                     |
| H5-72h | 23018161                                  | 11156075                                 | 51                             | 1032539                       | 92.2%                          | 7980186                     |
| H6-0h  | 18112353                                  | 9450237                                  | 50                             | 8529686                       | 90.0%                          | 6110302                     |
| H6-24h | 18419612                                  | 10260890                                 | 51                             | 9328179                       | 90.6%                          | 7078320                     |
| H6-48h | 19130571                                  | 10543071                                 | 50                             | 9721228                       | 91.8%                          | 7310548                     |
| H6-72h | 18810862                                  | 10857330                                 | 50                             | 1017581                       | 93.3%                          | 7657996                     |
| H7-0h  | 18438679                                  | 8526023                                  | 50                             | 7893428                       | 92.1%                          | 5666816                     |
| H7-24h | 20176785                                  | 10709870                                 | 50                             | 1004868                       | 93.5%                          | 7528436                     |
| H7-48h | 25947827                                  | 14121856                                 | 50.5                           | 1313489                       | 92.6%                          | 1025650                     |
| H7-72h | 21821418                                  | 11656927                                 | 51                             | 1096165                       | 93.6%                          | 8616341                     |
| H8-0h  | 24180545                                  | 13500189                                 | 50                             | 1252684                       | 92.4%                          | 9231933                     |
| H8-24h | 18784516                                  | 9993324                                  | 51                             | 9351613                       | 93.2%                          | 7172256                     |
| H8-48h | 22175150                                  | 11562073                                 | 50.5                           | 1080717                       | 93.1%                          | 7870190                     |
| H8-72h | 19340153                                  | 9988254                                  | 50                             | 9287351                       | 92.6%                          | 6542845                     |

<sup>a</sup> Count of the total number of sequences processed.

<sup>b</sup> Number of sequences actually used for the rest of the analysis after quality filtering.

<sup>c</sup> Number of aligned pairs mapped to the annotated equine genome.

<sup>d</sup> Concordant pair alignment rate to the annotated equine genome.

<sup>e</sup> Counts of reads assigned to a gene feature in the annotation file.
