# Supplementary material for: Characterization of an Ex Vivo Equine Endometrial Tissue Culture Model Using Next-Generation RNA-Sequencing Technology
Source: Animals (Basel). 2021 Jul 3;11(7):1995. doi: 10.3390/ani11071995 (PMC8300099; doi:10.3390/ani11071995)
Supplement: Supplementary file 1 [file animals-11-01995-s001.zip › Supplementary File 4 - Table S4 - Summary of the 41 enriched KEGG pathways when comparing the transcriptome at 24 h relative to the transcriptome at 0 h.xlsx]

## Sheet: enrichment.KEGG (2)
Table S7 - Summary of the 41 enriched KEGG pathways when comparing the transcriptome at 24 h relative to the transcriptome at 0 h
#pathway ID	pathway description	observed gene count	false discovery rate	matching proteins in your network (IDs)	matching proteins in your network (labels)
4610	Complement and coagulation cascades	27	1.27e-09	ENSECAP00000002192,ENSECAP00000003554,ENSECAP00000003584,ENSECAP00000003742,ENSECAP00000003974,ENSECAP00000005079,ENSECAP00000005652,ENSECAP00000005675,ENSECAP00000006150,ENSECAP00000006188,ENSECAP00000006615,ENSECAP00000006627,ENSECAP00000007506,ENSECAP00000008812,ENSECAP00000010424,ENSECAP00000010822,ENSECAP00000012338,ENSECAP00000012466,ENSECAP00000014469,ENSECAP00000014541,ENSECAP00000017316,…	A2M,BDKRB1,BDKRB2,C1QB,C1QC,C2,C3AR1,C4A,C6,C7,C9,CD55,ENSECAG00000000339,ENSECAG00000014414,F12,F13A1,F3,F5,KNG1,PLAT,PLAU,PLAUR,PLG,PROS1,SERPINA5,SERPINE1,THBD
4640	Hematopoietic cell lineage	28	3.53e-09	ENSECAP00000000048,ENSECAP00000000293,ENSECAP00000000334,ENSECAP00000001460,ENSECAP00000002580,ENSECAP00000003947,ENSECAP00000006754,ENSECAP00000007248,ENSECAP00000007561,ENSECAP00000007718,ENSECAP00000008636,ENSECAP00000009533,ENSECAP00000011188,ENSECAP00000012198,ENSECAP00000012382,ENSECAP00000012727,ENSECAP00000013084,ENSECAP00000013928,ENSECAP00000014219,ENSECAP00000014469,ENSECAP00000015713,…	CD1C,CD1E1,CD36,CD3E,CD3G,CD4,CD44,CD55,CSF1R,CSF3,FCER2,GM-CSF,IGHM,IL-1RII,IL11,IL1A,IL1B,IL2RA,IL4R,IL6,ITGA2,ITGA3,ITGA5,ITGB3,KIT,TFRC,TNF,TPO
4512	ECM-receptor interaction	27	3.74e-07	ENSECAP00000005931,ENSECAP00000006285,ENSECAP00000006461,ENSECAP00000007423,ENSECAP00000008636,ENSECAP00000008995,ENSECAP00000009363,ENSECAP00000009435,ENSECAP00000011576,ENSECAP00000012129,ENSECAP00000013084,ENSECAP00000013928,ENSECAP00000014936,ENSECAP00000015562,ENSECAP00000016485,ENSECAP00000016790,ENSECAP00000016800,ENSECAP00000019225,ENSECAP00000019239,ENSECAP00000019347,ENSECAP00000019961,…	CD36,CD44,COL1A2,COL2A1,COL4A4,COL4A6,ENSECAG00000011581,ITGA2,ITGA3,ITGA5,ITGB3,ITGB5,ITGB6,ITGB7,LAMA2,LAMA4,LAMB3,LAMB4,LAMC1,LAMC2,SPP1,SV2C,THBS1,THBS2,TNC,TNR,TNXB
4066	HIF-1 signaling pathway	29	5.2e-07	ENSECAP00000000404,ENSECAP00000002648,ENSECAP00000003893,ENSECAP00000004949,ENSECAP00000005202,ENSECAP00000005858,ENSECAP00000007539,ENSECAP00000008846,ENSECAP00000008990,ENSECAP00000009472,ENSECAP00000009534,ENSECAP00000010388,ENSECAP00000011965,ENSECAP00000013316,ENSECAP00000013806,ENSECAP00000014219,ENSECAP00000014535,ENSECAP00000015910,ENSECAP00000016524,ENSECAP00000017253,ENSECAP00000017450,…	ANGPT2,CDKN1A,CYBB,EDN1,EGFR,EGLN1,EGLN3,EIF4EBP1,ENO1,ENO2,ENSECAG00000003944,FLT1,G3PDH,HK1,HK2,HK3,IL6,INOS,MAP2K1,NOX1,PDK1,PFKFB3,PRKCG,SERPINE1,SLC2A1,TF,TFRC,TIMP1,VEGFA
4060	Cytokine-cytokine receptor interaction	43	7.61e-07	ENSECAP00000000048,ENSECAP00000000293,ENSECAP00000000611,ENSECAP00000001460,ENSECAP00000002580,ENSECAP00000002602,ENSECAP00000003025,ENSECAP00000003375,ENSECAP00000004731,ENSECAP00000004921,ENSECAP00000005580,ENSECAP00000006754,ENSECAP00000007539,ENSECAP00000007561,ENSECAP00000008846,ENSECAP00000009759,ENSECAP00000010054,ENSECAP00000010413,ENSECAP00000011188,ENSECAP00000012101,ENSECAP00000012153,…	CCL2,CCL20,CCR7,CD40,CNTFR,CSF1R,CSF3,CX3CR1,CXCR4,CXCR7,EDAR,EGFR,FIGF,FLT1,GM-CSF,IL-1RII,IL11,IL12A,IL13RA1,IL1A,IL1B,IL21R,IL23A,IL25,IL2RA,IL4R,IL6,IL8,KIT,LEPR,OSMR,PPBP,RELT,TNF,TNFRSF12A,TNFRSF17,TNFRSF18,TNFRSF21,TNFSF14,TNFSF15,TPO,VEGFA,VEGFC
10	Glycolysis / Gluconeogenesis	19	8.69e-06	ENSECAP00000002648,ENSECAP00000003332,ENSECAP00000004949,ENSECAP00000005858,ENSECAP00000006544,ENSECAP00000007277,ENSECAP00000008720,ENSECAP00000008893,ENSECAP00000009472,ENSECAP00000011062,ENSECAP00000011957,ENSECAP00000012929,ENSECAP00000013340,ENSECAP00000013524,ENSECAP00000014535,ENSECAP00000018516,ENSECAP00000018673,ENSECAP00000019665,ENSECAP00000020361	ALDH1A3,ALDH7A1,ALDOA,ALDOB,ALDOC,ENO1,ENO2,ENSECAG00000003944,G3PDH,HK1,HK2,HK3,LDHA,PCK2,PFKP,PGAM4,PGK1,PKM,TPI1
5146	Amoebiasis	26	2.02e-05	ENSECAP00000000048,ENSECAP00000000293,ENSECAP00000000334,ENSECAP00000001460,ENSECAP00000005931,ENSECAP00000006188,ENSECAP00000006285,ENSECAP00000006599,ENSECAP00000007561,ENSECAP00000009363,ENSECAP00000013083,ENSECAP00000014219,ENSECAP00000014452,ENSECAP00000016800,ENSECAP00000017253,ENSECAP00000017987,ENSECAP00000019225,ENSECAP00000019347,ENSECAP00000021019,ENSECAP00000021220,ENSECAP00000021294,…	ACTN1,ADCY1,ARG2,C9,COL1A2,COL2A1,COL4A4,COL4A6,GM-CSF,IGHM,IL-1RII,IL12A,IL1B,IL6,IL8,INOS,ITGB2,LAMA2,LAMA4,LAMB3,LAMB4,LAMC1,LAMC2,PRKCG,SERPINB10,TNF
4151	PI3K-Akt signaling pathway	55	2.48e-05	ENSECAP00000000334,ENSECAP00000002580,ENSECAP00000002820,ENSECAP00000004219,ENSECAP00000005931,ENSECAP00000006285,ENSECAP00000006461,ENSECAP00000006754,ENSECAP00000006952,ENSECAP00000007423,ENSECAP00000007539,ENSECAP00000008552,ENSECAP00000008846,ENSECAP00000008990,ENSECAP00000009363,ENSECAP00000009435,ENSECAP00000009759,ENSECAP00000010054,ENSECAP00000010531,ENSECAP00000011188,ENSECAP00000011576,…	ANGPT2,BCL2L1,CCND2,CDKN1A,COL1A2,COL2A1,COL4A4,COL4A6,CREB3L4,CSF1R,CSF3,DDIT4,EFNA4,EGFR,EIF4EBP1,ENSECAG00000011581,EPHA2,FGF10,FGF2,FGF21,FGF23,FIGF,FLT1,IGHM,IL2RA,IL4R,IL6,ITGA2,ITGA3,ITGA5,ITGB3,ITGB5,ITGB6,ITGB7,KIT,LAMA2,LAMA4,LAMB3,LAMB4,LAMC1,LAMC2,MAP2K1,MYC,NR4A1,OSMR,PCK2,PDGFD,SPP1,THBS1,THBS2,TNC,TNR,TNXB,VEGFA,VEGFC
4080	Neuroactive ligand-receptor interaction	44	3.83e-05	ENSECAP00000000954,ENSECAP00000001162,ENSECAP00000002192,ENSECAP00000002359,ENSECAP00000002393,ENSECAP00000003536,ENSECAP00000003601,ENSECAP00000003742,ENSECAP00000003943,ENSECAP00000003974,ENSECAP00000004429,ENSECAP00000005147,ENSECAP00000005421,ENSECAP00000006627,ENSECAP00000006892,ENSECAP00000007036,ENSECAP00000007287,ENSECAP00000008117,ENSECAP00000008233,ENSECAP00000008330,ENSECAP00000008428,…	ADRA1D,AGTR1,AVPR1A,BDKRB1,BDKRB2,C3AR1,CHRNB1,CNR2,CYSLTR1,DRD1,ENSECAG00000003466,ENSECAG00000006255,F2RL3,GABBR2,GCGR,GIPR,GLP2R,GPR35,GRIA2,GRIK2,GRIK4,GRM4,HCRTR1,HRH2,HTR6,LEPR,NMUR1,NPY1R,NPY5R,NTSR1,OPRK1,OPRL1,OXTR,P2RX1,P2RX6,P2RY13,P2RY2,PLG,PTGDR,PTGER3,PTGIR,RXFP1,S1PR1,TACR1
4510	Focal adhesion	39	0.000185	ENSECAP00000005931,ENSECAP00000006285,ENSECAP00000006461,ENSECAP00000007297,ENSECAP00000007423,ENSECAP00000007539,ENSECAP00000007570,ENSECAP00000008846,ENSECAP00000008990,ENSECAP00000009363,ENSECAP00000009435,ENSECAP00000009637,ENSECAP00000009759,ENSECAP00000010054,ENSECAP00000010531,ENSECAP00000011576,ENSECAP00000012129,ENSECAP00000013928,ENSECAP00000014676,ENSECAP00000014936,ENSECAP00000015562,…	ACTN1,CCND2,COL1A2,COL2A1,COL4A4,COL4A6,EGFR,ENSECAG00000011581,FIGF,FLNB,FLNC,FLT1,ITGA2,ITGA3,ITGA5,ITGB3,ITGB5,ITGB6,ITGB7,LAMA2,LAMA4,LAMB3,LAMB4,LAMC1,LAMC2,MAP2K1,PARVB,PARVG,PDGFD,PRKCG,SHC2,SPP1,THBS1,THBS2,TNC,TNR,TNXB,VEGFA,VEGFC
5133	Pertussis	19	0.000201	ENSECAP00000000048,ENSECAP00000001460,ENSECAP00000003554,ENSECAP00000004472,ENSECAP00000005652,ENSECAP00000007506,ENSECAP00000010532,ENSECAP00000011892,ENSECAP00000013083,ENSECAP00000014219,ENSECAP00000017316,ENSECAP00000017775,ENSECAP00000019716,ENSECAP00000021137,ENSECAP00000021220,ENSECAP00000021890,ENSECAP00000022221,ENSECAP00000022433,ENSECAP00000022617	C1QB,C1QC,C2,C4A,CALML3,CASP1,CXCL6,ENSECAG00000000339,FOS,IL12A,IL1A,IL1B,IL23A,IL6,IL8,INOS,ITGA5,ITGB2,TNF
5020	Prion diseases	12	0.000265	ENSECAP00000000048,ENSECAP00000006188,ENSECAP00000008990,ENSECAP00000010424,ENSECAP00000011992,ENSECAP00000014219,ENSECAP00000017316,ENSECAP00000017775,ENSECAP00000019408,ENSECAP00000021019,ENSECAP00000021137,ENSECAP00000021754	C1QB,C1QC,C6,C7,C9,EGR1,HSPA5,IL1A,IL1B,IL6,LAMC1,MAP2K1
5144	Malaria	14	0.000265	ENSECAP00000000048,ENSECAP00000001460,ENSECAP00000006754,ENSECAP00000006957,ENSECAP00000007423,ENSECAP00000011996,ENSECAP00000013083,ENSECAP00000013084,ENSECAP00000014219,ENSECAP00000014290,ENSECAP00000014907,ENSECAP00000019239,ENSECAP00000021220,ENSECAP00000022221	CD36,CD40,CSF3,ICAM1,IL12A,IL1B,IL6,IL8,ITGB2,SELE,THBS1,THBS2,TNF,VCAM
5200	Pathways in cancer	52	0.000265	ENSECAP00000000198,ENSECAP00000000389,ENSECAP00000000404,ENSECAP00000002580,ENSECAP00000002849,ENSECAP00000003260,ENSECAP00000003893,ENSECAP00000004232,ENSECAP00000004487,ENSECAP00000005931,ENSECAP00000006285,ENSECAP00000007539,ENSECAP00000007660,ENSECAP00000008552,ENSECAP00000008846,ENSECAP00000008925,ENSECAP00000008990,ENSECAP00000009189,ENSECAP00000009363,ENSECAP00000009759,ENSECAP00000010054,…	BCL2L1,CDKN1A,COL4A4,COL4A6,CSF1R,CYCS,E2F3,EGFR,EGLN1,EGLN3,FGF10,FGF2,FGF21,FGF23,FIGF,FOS,FZD2,GLI1,IL6,IL8,INOS,ITGA2,ITGA3,KIT,LAMA2,LAMA4,LAMB3,LAMB4,LAMC1,LAMC2,MAP2K1,MITF,MMP1,MMP9,MYC,NFKBIA,NTRK1,PRKCG,PTCH1,PTGS2,RET,RUNX1,RUNX1T1,SHH,SLC2A1,TGFA,VEGFA,VEGFC,WNT2B,WNT6,WNT8A,ZBTB16
1120	Microbial metabolism in diverse environments	29	0.000819	ENSECAP00000002648,ENSECAP00000003332,ENSECAP00000004557,ENSECAP00000004752,ENSECAP00000004949,ENSECAP00000005858,ENSECAP00000006544,ENSECAP00000007277,ENSECAP00000007871,ENSECAP00000008720,ENSECAP00000008893,ENSECAP00000009472,ENSECAP00000011062,ENSECAP00000011957,ENSECAP00000012929,ENSECAP00000013340,ENSECAP00000013524,ENSECAP00000014535,ENSECAP00000015783,ENSECAP00000017006,ENSECAP00000017490,…	ALDH1A3,ALDH7A1,ALDOA,ALDOB,ALDOC,AOX1,CAT,ENO1,ENO2,ENSECAG00000003944,FMO1,FMO5,G3PDH,HK1,HK2,HK3,LDHA,OGDHL,PCK2,PFKP,PGAM4,PGK1,PKM,PON3,PSAT1,RGN,SHMT2,SUOX,TPI1
4630	Jak-STAT signaling pathway	27	0.000819	ENSECAP00000001095,ENSECAP00000001560,ENSECAP00000002978,ENSECAP00000003580,ENSECAP00000003701,ENSECAP00000004731,ENSECAP00000006754,ENSECAP00000007561,ENSECAP00000010073,ENSECAP00000010531,ENSECAP00000012101,ENSECAP00000012198,ENSECAP00000014219,ENSECAP00000014770,ENSECAP00000015713,ENSECAP00000016828,ENSECAP00000016921,ENSECAP00000016953,ENSECAP00000018101,ENSECAP00000019165,ENSECAP00000019475,…	BCL2L1,CCND2,CNTFR,CSF3,ENSECAG00000004411,GM-CSF,IL11,IL12A,IL13RA1,IL13RA2,IL21R,IL23A,IL24,IL28B,IL2RA,IL4R,IL6,LEPR,MYC,OSMR,PIM1,PTPN6,SOCS1,SOCS3,SPRY2,SPRY4,TPO
4020	Calcium signaling pathway	32	0.00154	ENSECAP00000000334,ENSECAP00000000954,ENSECAP00000002606,ENSECAP00000003536,ENSECAP00000003601,ENSECAP00000003742,ENSECAP00000003974,ENSECAP00000004472,ENSECAP00000005147,ENSECAP00000006892,ENSECAP00000007928,ENSECAP00000008233,ENSECAP00000008330,ENSECAP00000008846,ENSECAP00000009417,ENSECAP00000010392,ENSECAP00000011923,ENSECAP00000014246,ENSECAP00000014860,ENSECAP00000015419,ENSECAP00000016825,…	ADCY1,ADCY8,ADRA1D,AGTR1,ATP2B2,AVPR1A,BDKRB1,BDKRB2,CACNA1B,CALML3,CD38,CYSLTR1,DRD1,EGFR,ERBB3,ERBB4,HRH2,HTR6,IGHM,INOS,NOS1,NTSR1,OXTR,P2RX1,P2RX6,PHKG2,PRKCG,PTGER3,RYR2,SLC8A3,TACR1,TNNC1
1230	Biosynthesis of amino acids	18	0.00183	ENSECAP00000002648,ENSECAP00000003332,ENSECAP00000004949,ENSECAP00000005858,ENSECAP00000006544,ENSECAP00000008720,ENSECAP00000008893,ENSECAP00000011062,ENSECAP00000012929,ENSECAP00000013340,ENSECAP00000013524,ENSECAP00000014452,ENSECAP00000015149,ENSECAP00000015783,ENSECAP00000018673,ENSECAP00000018721,ENSECAP00000019017,ENSECAP00000019665	ALDH7A1,ALDOA,ALDOB,ALDOC,ARG2,BCAT1,ENO1,ENO2,ENSECAG00000003944,G3PDH,MAT1A,PFKP,PGAM4,PGK1,PKM,PSAT1,SHMT2,TPI1
5202	Transcriptional misregulation in cancer	28	0.00193	ENSECAP00000000198,ENSECAP00000000293,ENSECAP00000000334,ENSECAP00000001969,ENSECAP00000002580,ENSECAP00000002603,ENSECAP00000003260,ENSECAP00000003375,ENSECAP00000003795,ENSECAP00000005675,ENSECAP00000006150,ENSECAP00000007561,ENSECAP00000007660,ENSECAP00000009579,ENSECAP00000010531,ENSECAP00000011232,ENSECAP00000011576,ENSECAP00000011698,ENSECAP00000013083,ENSECAP00000014219,ENSECAP00000014321,…	BCL2L1,CCND2,CCR7,CD40,CDKN1A,CSF1R,DOT1L,FLT1,GM-CSF,HPGD,IGFBP3,IGHM,IL-1RII,IL6,IL8,ITGB7,MMP9,MYC,MYCN,NFKBIZ,NTRK1,PLAT,PLAU,REL,RUNX1,RUNX1T1,TSPAN7,ZBTB16
5206	MicroRNAs in cancer	27	0.00193	ENSECAP00000001560,ENSECAP00000002820,ENSECAP00000005390,ENSECAP00000005675,ENSECAP00000007423,ENSECAP00000007539,ENSECAP00000008636,ENSECAP00000008846,ENSECAP00000008990,ENSECAP00000010531,ENSECAP00000011232,ENSECAP00000012129,ENSECAP00000015107,ENSECAP00000015562,ENSECAP00000016315,ENSECAP00000016485,ENSECAP00000016790,ENSECAP00000017253,ENSECAP00000018101,ENSECAP00000018987,ENSECAP00000019475,…	ABCC1,CCND2,CD44,CDKN1A,DDIT4,E2F3,EGFR,ERBB3,ITGA5,ITGB3,MAP2K1,MMP9,MYC,NOTCH1,PIM1,PLAU,PRKCG,PTGS2,SERPINB5,SOCS1,SPRY2,THBS1,TNC,TNR,TNXB,TP63,VEGFA
4668	TNF signaling pathway	22	0.00212	ENSECAP00000000048,ENSECAP00000000083,ENSECAP00000001460,ENSECAP00000002623,ENSECAP00000004921,ENSECAP00000006957,ENSECAP00000007561,ENSECAP00000007693,ENSECAP00000008544,ENSECAP00000008990,ENSECAP00000009534,ENSECAP00000010874,ENSECAP00000011232,ENSECAP00000011892,ENSECAP00000011996,ENSECAP00000014219,ENSECAP00000014290,ENSECAP00000015107,ENSECAP00000015241,ENSECAP00000020980,ENSECAP00000021726,…	BCL3,CASP10,CCL20,CREB3L4,CXCL1,EDN1,FOS,GM-CSF,ICAM1,IL1B,IL6,JUNB,MAP2K1,MAP3K8,MMP9,NFKBIA,PTGS2,SELE,SOCS3,TNF,TNFAIP3,VCAM
5143	African trypanosomiasis	10	0.00503	ENSECAP00000000048,ENSECAP00000000334,ENSECAP00000001460,ENSECAP00000006957,ENSECAP00000011996,ENSECAP00000014219,ENSECAP00000014290,ENSECAP00000016800,ENSECAP00000017253,ENSECAP00000022221	ICAM1,IGHM,IL12A,IL1B,IL6,LAMA4,PRKCG,SELE,TNF,VCAM
5323	Rheumatoid arthritis	17	0.00555	ENSECAP00000000048,ENSECAP00000000334,ENSECAP00000001460,ENSECAP00000004921,ENSECAP00000007539,ENSECAP00000007561,ENSECAP00000010532,ENSECAP00000011892,ENSECAP00000011996,ENSECAP00000012198,ENSECAP00000013083,ENSECAP00000014219,ENSECAP00000019716,ENSECAP00000021137,ENSECAP00000021220,ENSECAP00000021406,ENSECAP00000022964	CCL20,CXCL6,FLT1,FOS,GM-CSF,ICAM1,IGHM,IL11,IL1A,IL1B,IL23A,IL6,IL8,ITGB2,MMP1,TNF,VEGFA
5134	Legionellosis	13	0.00589	ENSECAP00000000048,ENSECAP00000001460,ENSECAP00000005652,ENSECAP00000008544,ENSECAP00000012031,ENSECAP00000013083,ENSECAP00000014219,ENSECAP00000015204,ENSECAP00000017295,ENSECAP00000020980,ENSECAP00000021220,ENSECAP00000021890,ENSECAP00000022221	BNIP3,CASP1,CXCL1,CYCS,ENSECAG00000000339,IL12A,IL1B,IL6,IL8,ITGB2,NFKBIA,NLRC4,TNF
5205	Proteoglycans in cancer	33	0.00589	ENSECAP00000000389,ENSECAP00000001095,ENSECAP00000001460,ENSECAP00000004232,ENSECAP00000005675,ENSECAP00000006461,ENSECAP00000007423,ENSECAP00000007539,ENSECAP00000007935,ENSECAP00000008520,ENSECAP00000008552,ENSECAP00000008636,ENSECAP00000008846,ENSECAP00000008990,ENSECAP00000009637,ENSECAP00000010877,ENSECAP00000011232,ENSECAP00000012063,ENSECAP00000012430,ENSECAP00000012484,ENSECAP00000014676,…	CD44,CDKN1A,EGFR,ERBB3,ERBB4,ESR1,FGF10,FGF2,FGF21,FGF23,FLNB,FLNC,FZD2,GPC3,HBEGF,ITGA2,ITGA5,ITGB3,ITGB5,MAP2K1,MMP9,MYC,PLAU,PLAUR,PRKCG,PTCH1,PTPN6,THBS1,TNF,VEGFA,WNT2B,WNT6,WNT8A
5150	Staphylococcus aureus infection	12	0.00638	ENSECAP00000000334,ENSECAP00000002192,ENSECAP00000003554,ENSECAP00000004429,ENSECAP00000005110,ENSECAP00000005652,ENSECAP00000006627,ENSECAP00000007506,ENSECAP00000011996,ENSECAP00000017316,ENSECAP00000017775,ENSECAP00000021220	C1QB,C1QC,C2,C3AR1,C4A,ENSECAG00000000339,ENSECAG00000006255,FCGR3A,ICAM1,IGHM,ITGB2,PLG
5322	Systemic lupus erythematosus	13	0.00834	ENSECAP00000000334,ENSECAP00000001460,ENSECAP00000003554,ENSECAP00000005110,ENSECAP00000005652,ENSECAP00000006188,ENSECAP00000007506,ENSECAP00000010424,ENSECAP00000014907,ENSECAP00000017316,ENSECAP00000017775,ENSECAP00000017987,ENSECAP00000019408	ACTN1,C1QB,C1QC,C2,C4A,C6,C7,C9,CD40,ENSECAG00000000339,FCGR3A,IGHM,TNF
4145	Phagosome	23	0.0109	ENSECAP00000000334,ENSECAP00000005110,ENSECAP00000005116,ENSECAP00000005652,ENSECAP00000006461,ENSECAP00000007251,ENSECAP00000007423,ENSECAP00000007928,ENSECAP00000009241,ENSECAP00000010184,ENSECAP00000012435,ENSECAP00000013084,ENSECAP00000015910,ENSECAP00000016485,ENSECAP00000016633,ENSECAP00000018182,ENSECAP00000018708,ENSECAP00000019239,ENSECAP00000021087,ENSECAP00000021220,ENSECAP00000021947,…	CD36,COLEC12,CYBB,DYNC1I1,ENSECAG00000000339,ENSECAG00000021212,ENSECAG00000023677,FCGR3A,IGHM,ITGA2,ITGA5,ITGB2,ITGB3,ITGB5,MARCO,MSR1,NCF4,NOS1,NOX1,SFTPD,TFRC,THBS1,THBS2
4974	Protein digestion and absorption	15	0.0114	ENSECAP00000001752,ENSECAP00000006594,ENSECAP00000008210,ENSECAP00000008244,ENSECAP00000009363,ENSECAP00000009435,ENSECAP00000009592,ENSECAP00000010131,ENSECAP00000013070,ENSECAP00000019225,ENSECAP00000019596,ENSECAP00000020168,ENSECAP00000021294,ENSECAP00000022559,ENSECAP00000022659	ACE2,COL12A1,COL17A1,COL1A2,COL21A1,COL2A1,COL4A4,COL4A6,COL9A1,ENSECAG00000011581,KCNN4,SLC15A1,SLC1A5,SLC8A3,XPNPEP2
5222	Small cell lung cancer	17	0.0117	ENSECAP00000005931,ENSECAP00000006285,ENSECAP00000009363,ENSECAP00000012031,ENSECAP00000013928,ENSECAP00000014770,ENSECAP00000015107,ENSECAP00000016800,ENSECAP00000019225,ENSECAP00000019347,ENSECAP00000019475,ENSECAP00000020954,ENSECAP00000020980,ENSECAP00000021019,ENSECAP00000022433,ENSECAP00000022803,ENSECAP00000022822	BCL2L1,COL4A4,COL4A6,CYCS,E2F3,INOS,ITGA2,ITGA3,LAMA2,LAMA4,LAMB3,LAMB4,LAMC1,LAMC2,MYC,NFKBIA,PTGS2
51	Fructose and mannose metabolism	9	0.0118	ENSECAP00000003332,ENSECAP00000009472,ENSECAP00000010388,ENSECAP00000011062,ENSECAP00000013340,ENSECAP00000013524,ENSECAP00000014535,ENSECAP00000018673,ENSECAP00000020361	ALDOA,ALDOB,ALDOC,HK1,HK2,HK3,PFKFB3,PFKP,TPI1
380	Tryptophan metabolism	11	0.0118	ENSECAP00000004752,ENSECAP00000007803,ENSECAP00000008893,ENSECAP00000012229,ENSECAP00000012687,ENSECAP00000013309,ENSECAP00000015662,ENSECAP00000017490,ENSECAP00000017729,ENSECAP00000020269,ENSECAP00000022515	ABP1,ALDH7A1,AOX1,AOX4,CAT,CYP1A1,DDC,ENSECAG00000014951,HAAO,KMO,OGDHL
1200	Carbon metabolism	20	0.0118	ENSECAP00000002648,ENSECAP00000003332,ENSECAP00000004752,ENSECAP00000004949,ENSECAP00000005858,ENSECAP00000006544,ENSECAP00000007658,ENSECAP00000008720,ENSECAP00000009472,ENSECAP00000011062,ENSECAP00000012929,ENSECAP00000013340,ENSECAP00000013524,ENSECAP00000014535,ENSECAP00000015783,ENSECAP00000017006,ENSECAP00000018673,ENSECAP00000019017,ENSECAP00000019665,ENSECAP00000020361	ALDH6A1,ALDOA,ALDOB,ALDOC,ENO1,ENO2,ENSECAG00000003944,G3PDH,HK1,HK2,HK3,OGDHL,PFKP,PGAM4,PGK1,PKM,PSAT1,RGN,SHMT2,TPI1
5219	Bladder cancer	10	0.0133	ENSECAP00000007423,ENSECAP00000007539,ENSECAP00000008846,ENSECAP00000008990,ENSECAP00000011232,ENSECAP00000013083,ENSECAP00000018987,ENSECAP00000019475,ENSECAP00000020954,ENSECAP00000021406	CDKN1A,E2F3,EGFR,IL8,MAP2K1,MMP1,MMP9,MYC,THBS1,VEGFA
4380	Osteoclast differentiation	21	0.0136	ENSECAP00000000048,ENSECAP00000001460,ENSECAP00000002580,ENSECAP00000002623,ENSECAP00000004487,ENSECAP00000005110,ENSECAP00000007251,ENSECAP00000008990,ENSECAP00000011892,ENSECAP00000012909,ENSECAP00000015583,ENSECAP00000015910,ENSECAP00000016485,ENSECAP00000018182,ENSECAP00000018848,ENSECAP00000019627,ENSECAP00000020571,ENSECAP00000020980,ENSECAP00000021137,ENSECAP00000022763,ENSECAP00000022773	BTK,CSF1R,CYBB,FCGR3A,FHL2,FOS,FOSB,FOSL1,IL1A,IL1B,ITGB3,JUNB,MAP2K1,MITF,NCF4,NFKBIA,NOX1,SOCS1,SOCS3,TNF,TREM2
5140	Leishmaniasis	14	0.0136	ENSECAP00000000048,ENSECAP00000000334,ENSECAP00000001095,ENSECAP00000001460,ENSECAP00000005110,ENSECAP00000005652,ENSECAP00000007251,ENSECAP00000011892,ENSECAP00000015107,ENSECAP00000020980,ENSECAP00000021137,ENSECAP00000021220,ENSECAP00000022221,ENSECAP00000022433	ENSECAG00000000339,FCGR3A,FOS,IGHM,IL12A,IL1A,IL1B,INOS,ITGB2,NCF4,NFKBIA,PTGS2,PTPN6,TNF
830	Retinol metabolism	9	0.0275	ENSECAP00000000324,ENSECAP00000004322,ENSECAP00000012229,ENSECAP00000017558,ENSECAP00000017729,ENSECAP00000019834,ENSECAP00000020271,ENSECAP00000021097,ENSECAP00000022515	ALDH1A1,AOX1,AOX4,BCMO1,CYP1A1,CYP26A1,CYP26B1,DHRS9,RDH10
4064	NF-kappa B signaling pathway	16	0.0275	ENSECAP00000000048,ENSECAP00000000334,ENSECAP00000001460,ENSECAP00000004938,ENSECAP00000005675,ENSECAP00000007693,ENSECAP00000011996,ENSECAP00000012488,ENSECAP00000013083,ENSECAP00000014290,ENSECAP00000014770,ENSECAP00000014907,ENSECAP00000015089,ENSECAP00000015107,ENSECAP00000018848,ENSECAP00000020980	BCL2L1,BTK,CARD11,CD40,ICAM1,IGHM,IL1B,IL8,LBP,NFKBIA,PLAU,PTGS2,TNF,TNFAIP3,TNFSF14,VCAM
5132	Salmonella infection	15	0.0275	ENSECAP00000000048,ENSECAP00000007561,ENSECAP00000008544,ENSECAP00000009637,ENSECAP00000011892,ENSECAP00000012237,ENSECAP00000012435,ENSECAP00000012488,ENSECAP00000013083,ENSECAP00000014219,ENSECAP00000014676,ENSECAP00000017295,ENSECAP00000021137,ENSECAP00000021890,ENSECAP00000022433	CASP1,CXCL1,DYNC1I1,FLNB,FLNC,FOS,GM-CSF,IL1A,IL1B,IL6,IL8,INOS,LBP,NLRC4,PFN4
5142	Chagas disease (American trypanosomiasis)	18	0.0281	ENSECAP00000000048,ENSECAP00000001460,ENSECAP00000003742,ENSECAP00000003947,ENSECAP00000005652,ENSECAP00000011043,ENSECAP00000011650,ENSECAP00000011892,ENSECAP00000012382,ENSECAP00000013083,ENSECAP00000014219,ENSECAP00000017316,ENSECAP00000017450,ENSECAP00000017775,ENSECAP00000020980,ENSECAP00000022221,ENSECAP00000022433,ENSECAP00000022624	ACE,ADCY1,BDKRB2,C1QB,C1QC,CD3E,CD3G,ENSECAG00000000339,FOS,GNAO1,IL12A,IL1B,IL6,IL8,INOS,NFKBIA,SERPINE1,TNF
4614	Renin-angiotensin system	5	0.0328	ENSECAP00000000954,ENSECAP00000001752,ENSECAP00000007522,ENSECAP00000011650,ENSECAP00000016896	ACE,ACE2,AGTR1,ENPEP,REN
